# Supplementary material
Source: PubMed Central journal article supplement (PMC8555654)
Supplement: NIHMS1741749-supplement-1.pdf [file NIHMS1741749-supplement-1.pdf]

Supplementary Figure 1: Scatter plots for effect of inhibitors on spine density

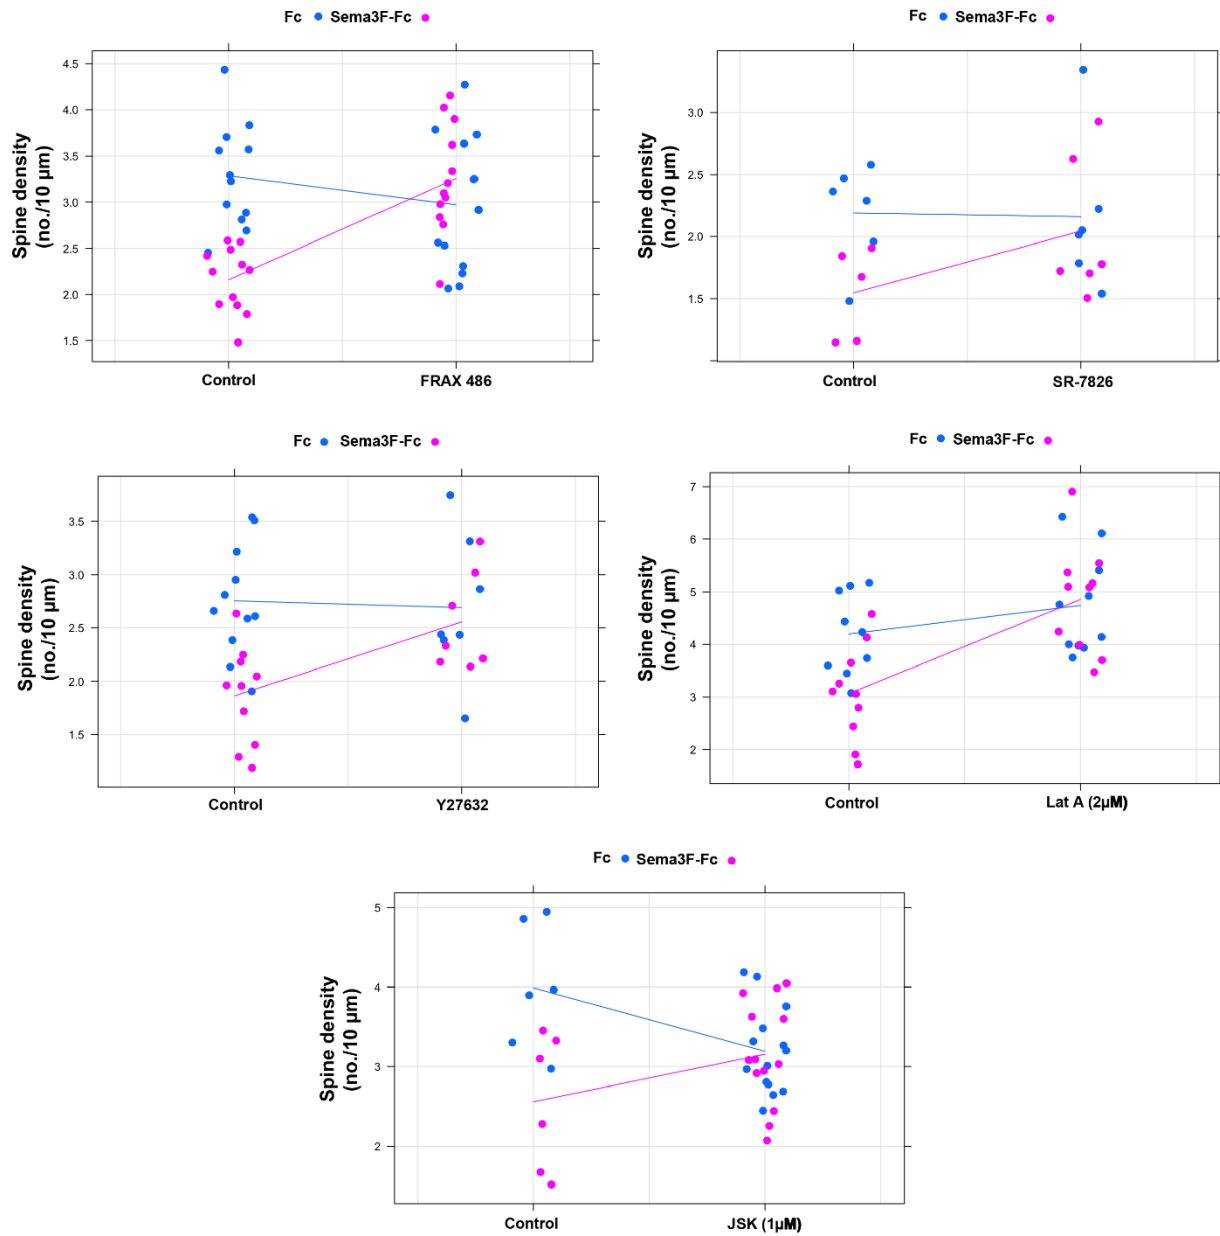

## Supplementary Figure 2: Tiam1 Co-IP Replicates

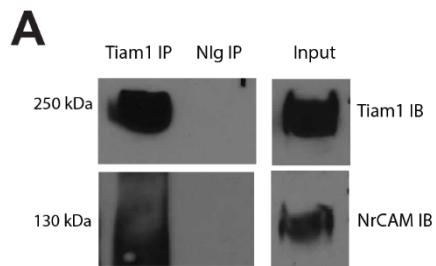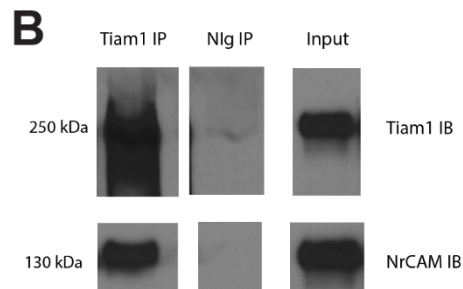

## Supplementary Table 1 Multinomial logistic regression fits for spine morphology

### Percent of Spines (% $\pm$ S. E. M.)

| Treatment               | Control          |                  |                  | Treated          |                  |                  |
|-------------------------|------------------|------------------|------------------|------------------|------------------|------------------|
|                         | Mushroom         | Stubby           | Thin             | Mushroom         | Stubby           | Thin             |
| SR7862                  | 41.59 $\pm$ 0.07 | 28.75 $\pm$ 0.05 | 29.66 $\pm$ 0.04 | 47.51 $\pm$ 0.09 | 29.85 $\pm$ 0.10 | 22.65 $\pm$ 0.08 |
| Y27632                  | 46.05 $\pm$ 0.09 | 26.26 $\pm$ 0.04 | 27.69 $\pm$ 0.05 | 47.94 $\pm$ 0.02 | 32.79 $\pm$ 0.06 | 19.27 $\pm$ 0.04 |
| FRAX 486                | 39.71 $\pm$ 0.06 | 33.07 $\pm$ 0.06 | 27.22 $\pm$ 0.06 | 39.86 $\pm$ 0.11 | 31.89 $\pm$ 0.12 | 28.25 $\pm$ 0.07 |
| Jasplakinolide          | 47.96 $\pm$ 0.10 | 27.23 $\pm$ 0.11 | 24.80 $\pm$ 0.07 | 48.3 $\pm$ 0.09  | 28.02 $\pm$ 0.08 | 23.69 $\pm$ 0.06 |
| Latrunculin (2 $\mu$ M) | 44.58 $\pm$ 0.06 | 28.34 $\pm$ 0.07 | 27.09 $\pm$ 0.06 | 46.99 $\pm$ 0.06 | 26.27 $\pm$ 0.04 | 26.74 $\pm$ 0.06 |

### P-values for effect of treatment on spine morphology (compared to % mushroom spines)

|                | Stubby | Thin |
|----------------|--------|------|
| SR7862         | 0.98   | 0.31 |
| Y27632         | 0.72   | 0.28 |
| FRAX           | 0.9    | 0.76 |
| Jasplakinolide | 0.84   | 0.69 |
| Latrunculin    | 0.41   | 0.73 |
